# Supplementary material
Source: PubMed Central journal article supplement (PMC9166661)

# Supplementary Figure 1

**A**

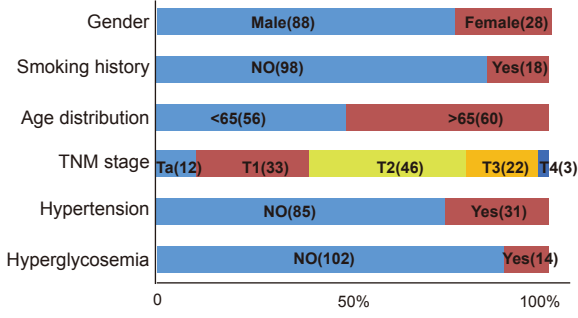

**B**

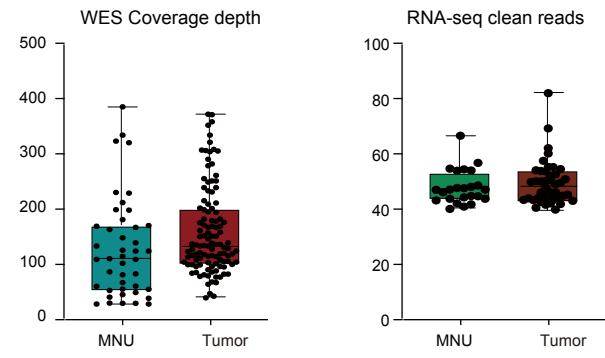

**C**

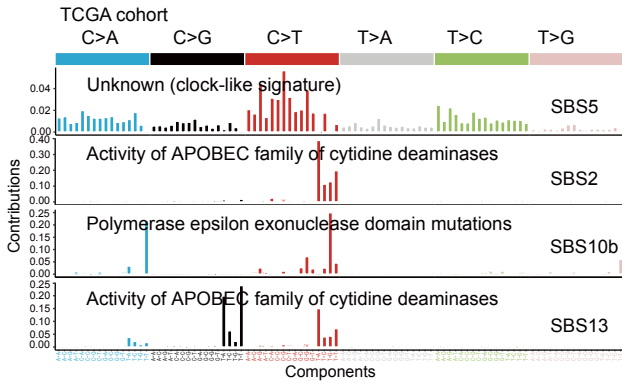

**D**

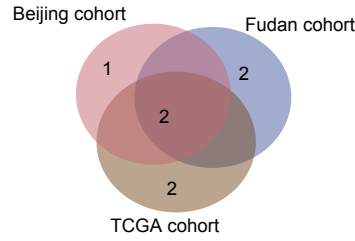

**E**

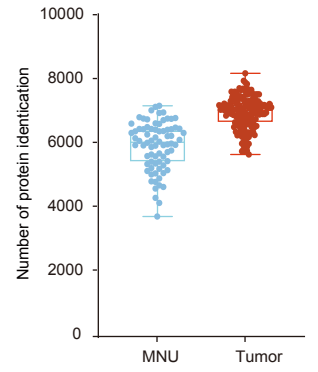

**F**

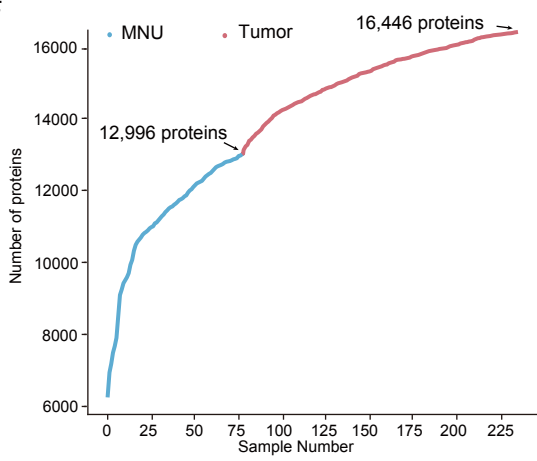

**G**

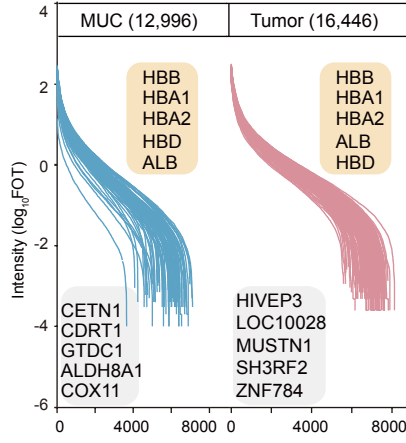

**H**

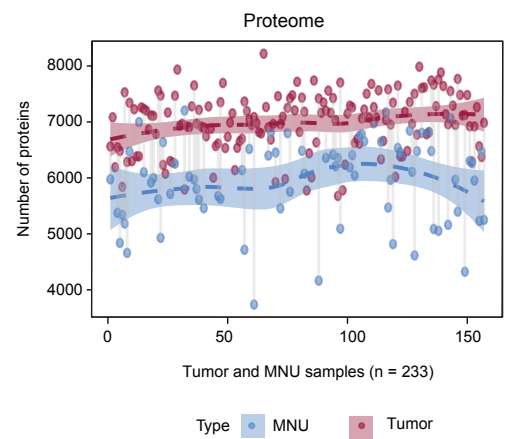

**I**

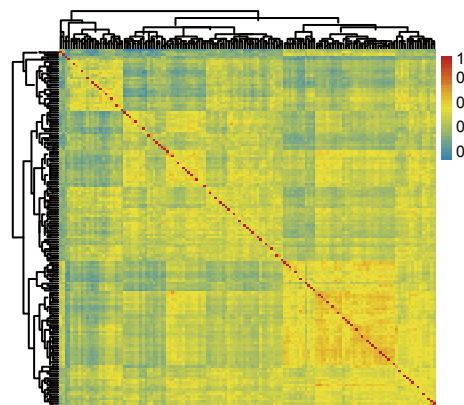

**J**

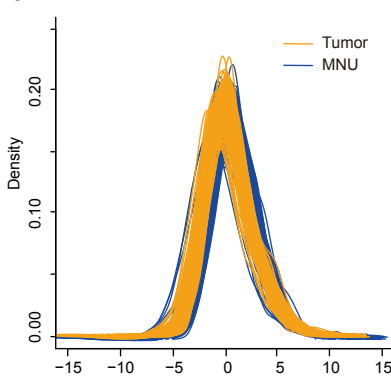

**K**

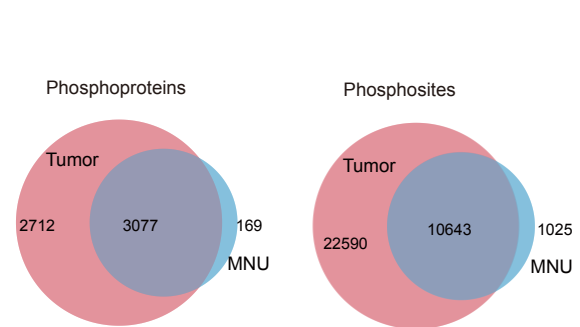

**L**

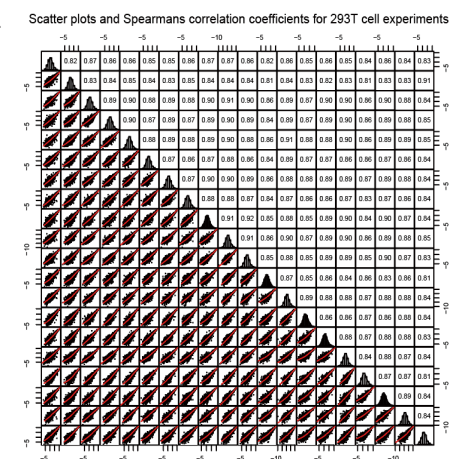

**M**

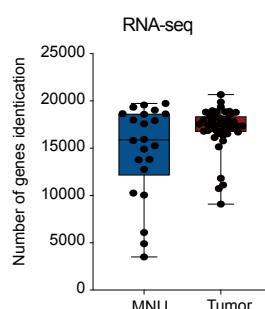

**N**

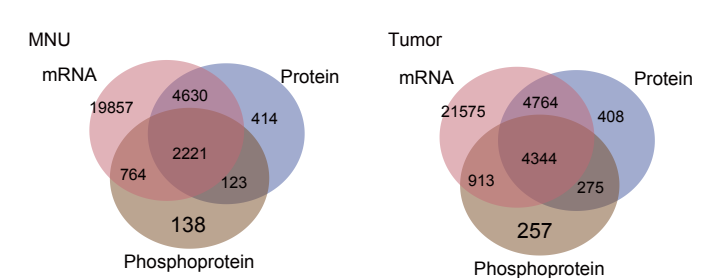

Supplement: 13045_2022_1291_MOESM1_ESM.pdf [file 13045_2022_1291_MOESM1_ESM.pdf]
