# Supplementary material
Source: PubMed Central journal article supplement (PMC9166661)

# Supplementary Figure 7

A

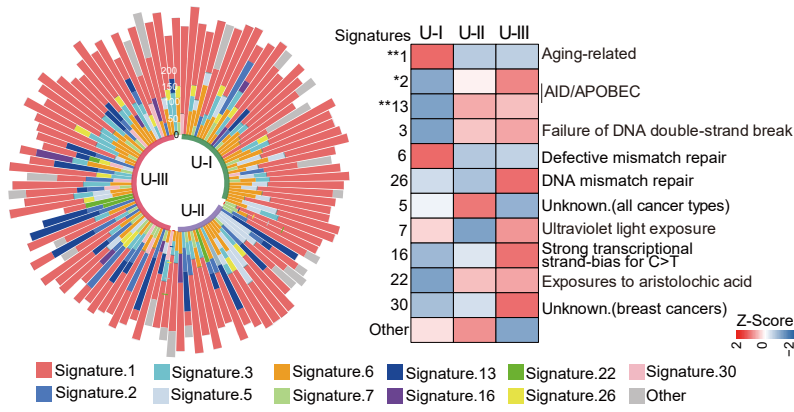

B

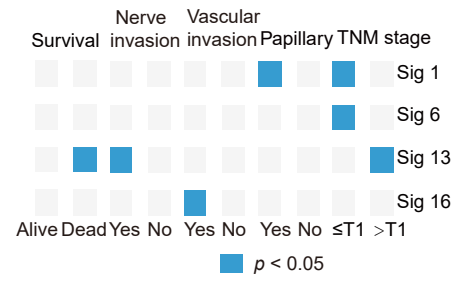

C

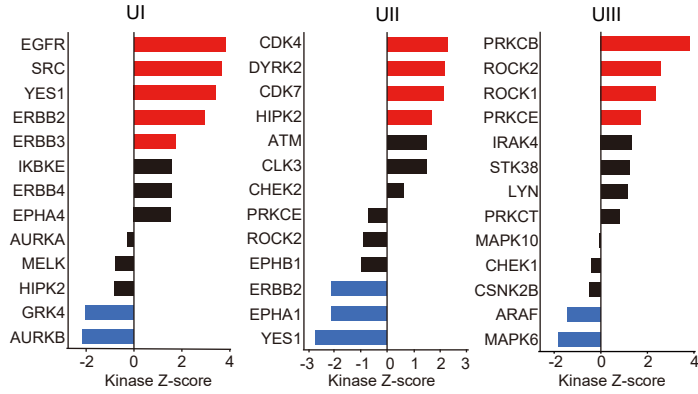

D

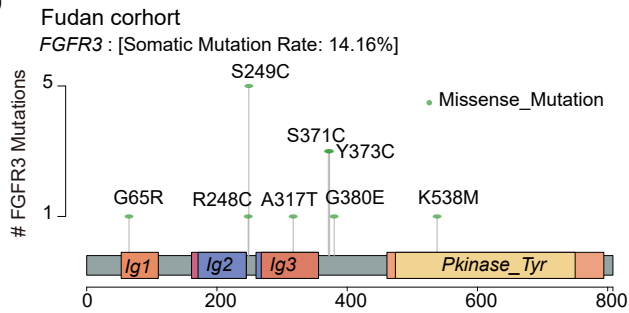

E

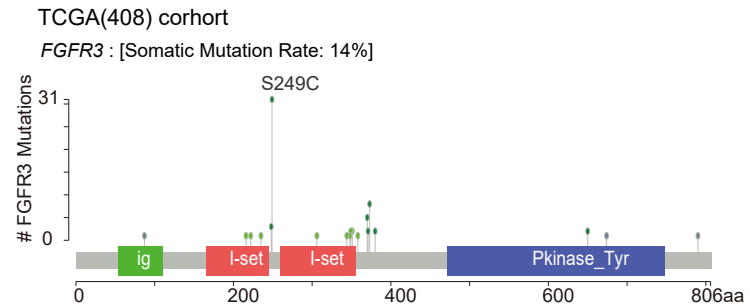

Supplement: 13045_2022_1291_MOESM7_ESM.pdf [file 13045_2022_1291_MOESM7_ESM.pdf]
