# Supplementary material
Source: PubMed Central journal article supplement (PMC9166661)

# Supplementary Figure 10

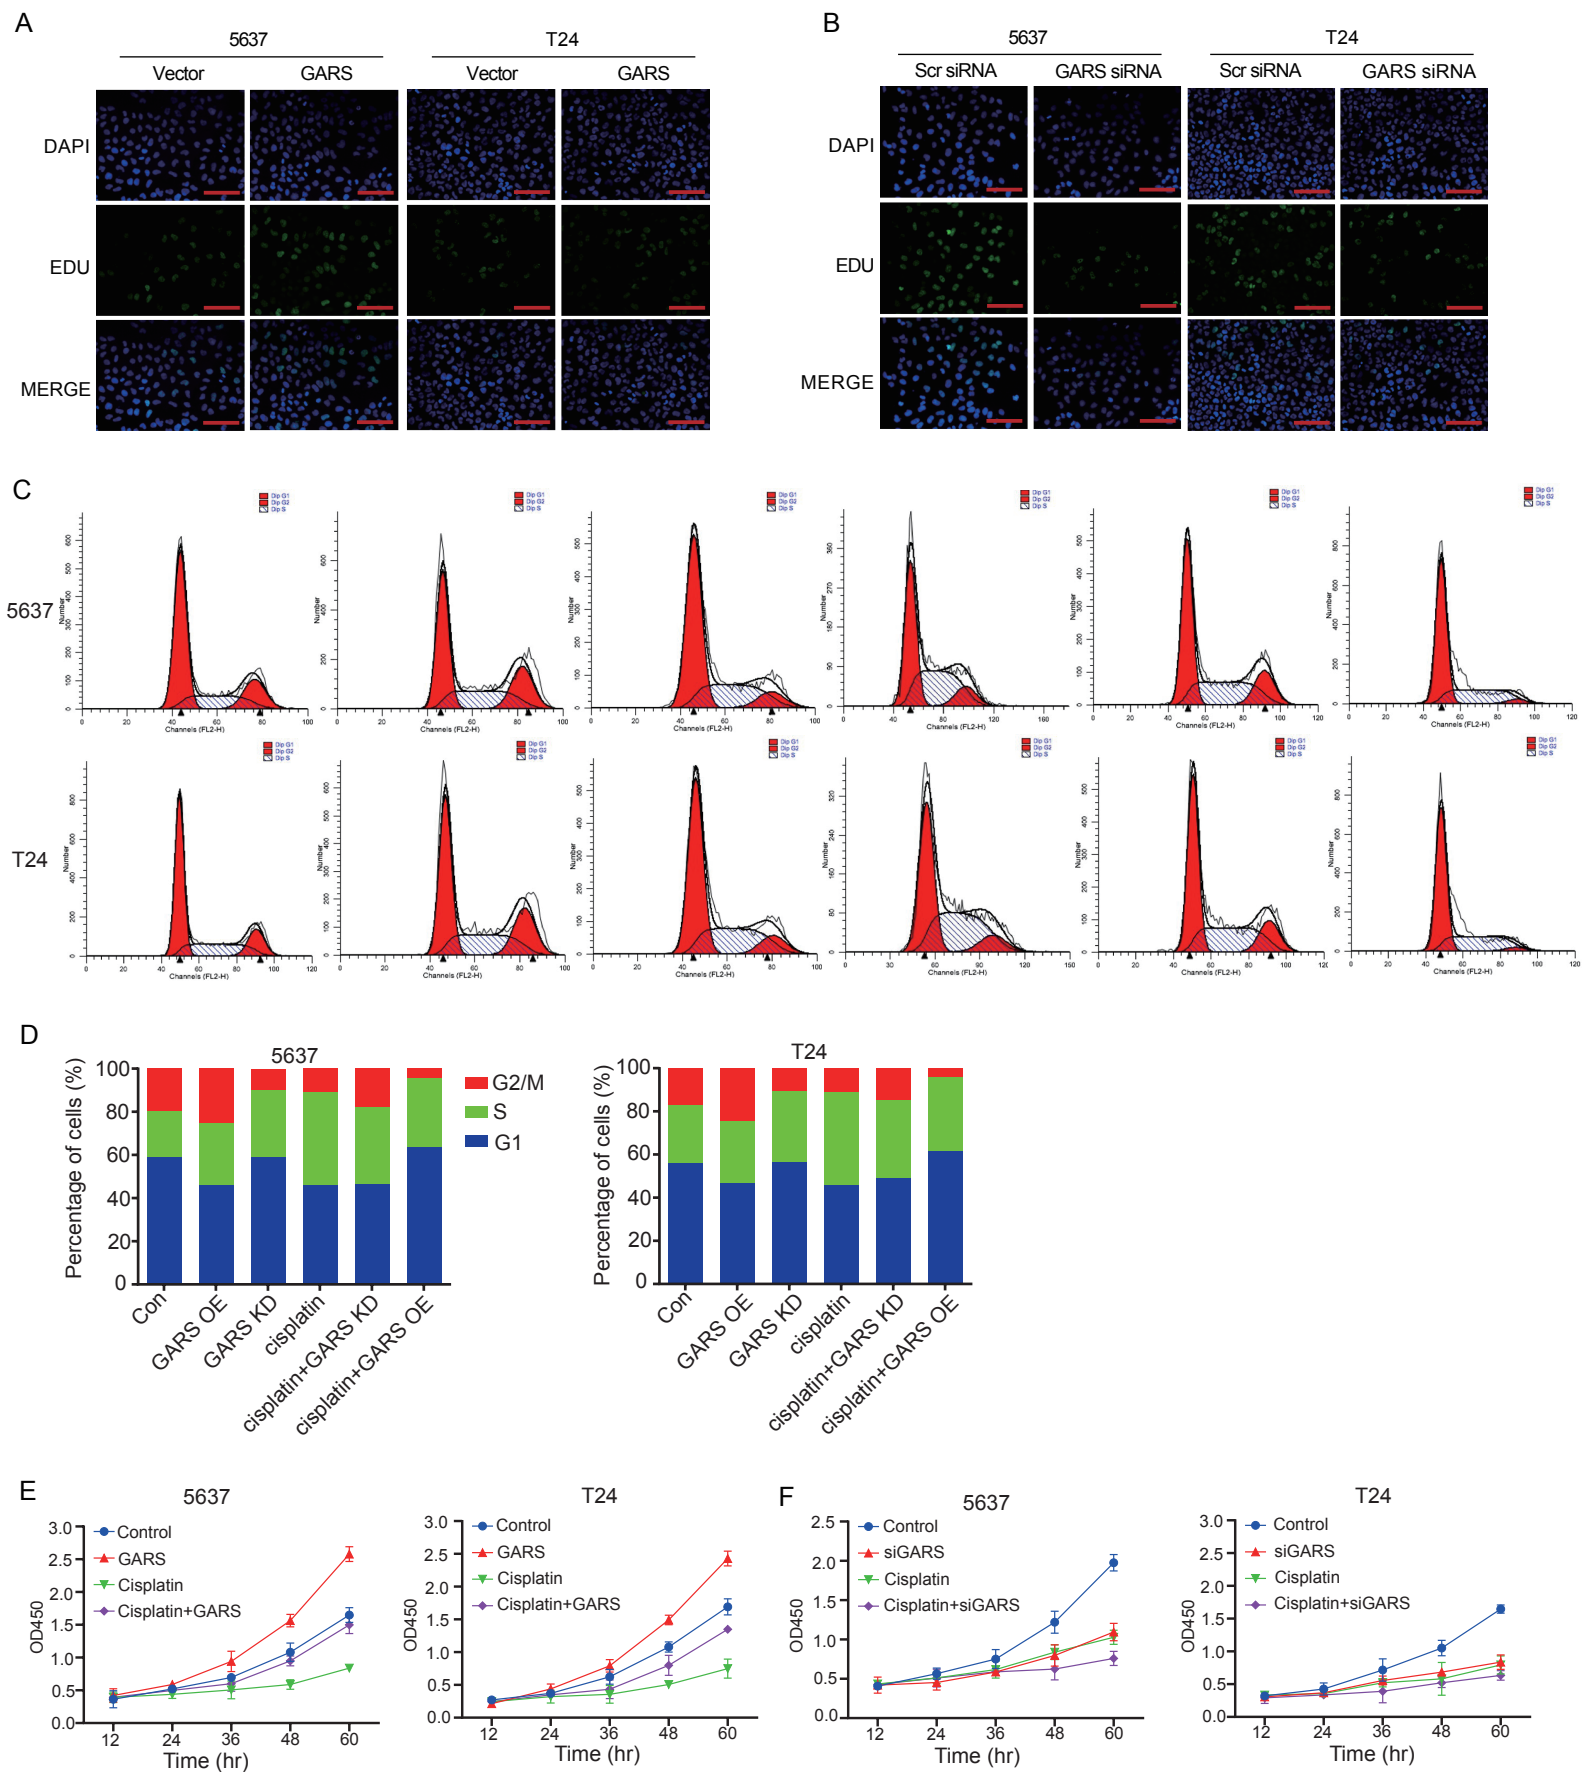

Supplement: 13045_2022_1291_MOESM10_ESM.pdf [file 13045_2022_1291_MOESM10_ESM.pdf]
